# Supplementary material
Source: PubMed Central journal article supplement (PMC5358364)
Supplement: pnas.1619581114.sapp.pdf [file pnas.1619581114.sapp.pdf]

## Supporting Information

### Bioinformatic analysis of riboswitch structures uncovers variant classes with altered ligand specificity

**Zasha Weinberg<sup>a,1,2</sup>, James W. Nelson<sup>b,1,3</sup>, Christina E. Lünse<sup>b,4</sup>, Madeline E. Sherlock<sup>c</sup>, Ronald R. Breaker<sup>a,b,c,5</sup>**

<sup>a</sup>Howard Hughes Medical Institute, <sup>b</sup>Department of Molecular, Cellular and Developmental Biology,

<sup>c</sup>Department of Molecular Biophysics and Biochemistry, Yale University, P.O. Box 208103, New Haven, CT 06520-8103, USA.

<sup>1</sup>Co-first authors.

<sup>2</sup>Present address: Zasha Weinberg, Bioinformatics Group, Department of Computer Science and Interdisciplinary Center for Bioinformatics, Universität Leipzig, Härtelstraße 16-18, D-04107 Leipzig, Germany.

<sup>3</sup>Present address: James Nelson, Department of Chemistry and Chemical Biology, Harvard University, Cambridge, MA USA 02139; Howard Hughes Medical Institute.

<sup>4</sup>Present address: Christina E. Lünse, Institute of Biochemistry, Universität Leipzig, Brüderstraße 34, D-04103 Leipzig, Germany.

<sup>5</sup>To whom correspondence should be addressed. Email: ronald.breaker@yale.edu.

## SI Text.

**Design of RNA Constructs to Examine Glycine Riboswitch D,G,A Variants by In-line Probing.** We designed RNA constructs containing D,G,A group sequences for in-line probing as follows. First, we designed independent aptamer I and II constructs similar to RNAs tested previously (1, 2), where aptamer I and II refer to the 5'- and 3'-most aptamer domains, respectively. Even though glycine binding for aptamer I of the glycine riboswitch was never observed (2, 3), we decided to test this construct for the variant, because it is possible that aptamer II-independent ligand binding would be possible in this case. Aptamer II constructs were tested as concise (just containing nucleotides in the aptamer II region) or extended RNAs (containing part of aptamer I). The latter D,G,A variant construct is comparable to the VC-II construct examined previously (1). It has been previously shown for glycine riboswitches that part of aptamer I is necessary for aptamer II to bind (1-3). The complete set of RNA molecules tested for the D,G,A group is given in **Fig. S5C** and the primers used to construct those molecules are found in **Table S4**.

**Variants of Ni<sup>2+</sup>/Co<sup>2+</sup>-binding Riboswitches Retain Ligand Specificity of the Parent Aptamer.** Our analysis also uncovered novel variant RNAs related to the Ni<sup>2+</sup>/Co<sup>2+</sup>-binding riboswitch class (4). Parent 'Ni/Co' riboswitches are most often located upstream of genes encoding proteins with COG0053 domains, which are predicted to function as transporters of Co<sup>2+</sup>, Zn<sup>2+</sup> or Cd<sup>2+</sup>. Since Ni/Co riboswitches bind up to four divalent metal ion ligands in a cooperative manner, these multiple binding sites involve greater number of nucleotides that make direct contact to ligands. Therefore, the key nucleotides for parent Ni/Co riboswitches consist of A,G,G,G,G at positions 14, 45, 46, 47, 87 and 88, respectively, following the numbering system described previously (4).

We investigated Ni/Co riboswitch variants with the key nucleotides A,G,G,G,A,G and A,C,G,G,A,G (**Fig. S7**), which share a G87A modification, and are both commonly associated with genes coding for the TIGR01525 protein domain. This protein domain is not associated with canonical Ni/Co riboswitches, but is annotated as a heavy-metal transporter. Although the heavy-metal transporting domain shares BLAST homology with other domains commonly associated with Ni/Co riboswitches, the distinct domain classification might suggest an altered substrate specificity of the proteins, and therefore a corresponding change to the riboswitches.

However, in-line probing data indicate that a representative of the A,G,G,G,A,G group of variants retains the ability to bind both Ni<sup>2+</sup> and Co<sup>2+</sup> with binding curves that are characteristic of cooperativity (**Fig. S7**). These results indicate that this single mutation of a key nucleotide in this particular example

does not alter the multiple binding pockets of Ni/Co riboswitches in a manner that disrupts its original metal ion specificity. Moreover, these results are consistent with the view that the strongest candidates for ligand changes can be found by identifying variants that are functionally and structurally distinct from genes regulated by the parent class. In the current case, the TIGR01525 domains associated with the A,G,G,G,A,G group of variants presumably have very similar biochemical function as genes associated with known Ni/Co riboswitches, and might be only modestly diverged in sequence and structure.

Another factor that might explain the retention of ligand specificity is that Ni/Co riboswitches bind 3 to 4 ions cooperatively (4). Therefore, they would need to change several binding sites simultaneously to completely change their ligand specificity. Perhaps they have altered the number of cooperative metal binding sites present, or have altered the specificity of only some sites.

**Table S1.** This table describes search parameters for each riboswitch class. “Riboswitch”: the name of the riboswitch. “Rfam accession”: the accession of the model used in the Rfam database. Some models were made by us to provide better coverage in sequence-space around the representative sequence that was crystallized. In comparison to other riboswitch structures, RNAs representing Mn<sup>2+</sup> and preQ<sub>1</sub>-I classes have less conserved sequence or structure that can be exploited by homology search algorithms to discriminate between true and false homologs. Current search technologies fail to find certain examples of these riboswitch classes unless multiple search models are used. Also, the Ni/Co and preQ<sub>1</sub>-III riboswitch classes were not yet present in Rfam. Therefore, we made additional models, by applying iterative searches with Infernal. The accessions of these models do not begin with the letters ‘RF’ and are available in **Dataset S2** at <http://breaker.yale.edu/variants>. “PDB accession (chain)”: the accession of the crystallized riboswitch. In parentheses, the chain we used is given. “Ligand name”: is the name of the ligand molecule used to find key nucleotides. It is usually a HETATM in PDB, but in the case of the group I intron, we used the G nucleotide within the RNA chain. “Notes”: exceptions to the general procedure. “Score” refers to a special score threshold used in the cmsearch program that was used when searching PDB in order to be able to find the relevant entry. “No GSC” means that the GSC algorithm was not used to weight sequences, because this process took too long. Each of the following distances was used independently to analyze which nucleotides are close to the ligand (distances in Å): 2, 2.25, 2.5, 2.75, 3, 3.25, 3.5, 3.75, 4, 4.5 and 5.

| Riboswitch            | Rfam accession | PDB accession (chain) | Ligand name in PDB (chain, if different from riboswitch chain) | Notes     |
|-----------------------|----------------|-----------------------|----------------------------------------------------------------|-----------|
| FMN                   | RF00050        | 3fq2 (X)              | FMN                                                            |           |
| TPP                   | RF00059        | 2hoj (A)              | TPP                                                            |           |
|                       | RF00059        | 3d2g (A)              | TPP                                                            |           |
|                       | RF00059        | 2gdi (X)              | TPP                                                            |           |
| SAM-I                 | RF00162        | 4kqy (A)              | SAM                                                            |           |
|                       | RF00162        | 2gis (A)              | SAM                                                            |           |
|                       | RF00162        | 3gx5 (A)              | SAM                                                            |           |
| Lysine                | RF00168        | 3dil (A)              | LYS                                                            |           |
| <i>glmS</i>           | RF00234        | 2nz4 (P)              | GLP                                                            |           |
|                       | RF00234        | 2z75 (B)              | GLP (A)                                                        |           |
| Glycine               | RF00504        | 3oww (A)              | GLY                                                            |           |
|                       | RF00504        | 3p49 (A)              | GLY                                                            |           |
| SAM-II                | RF00521        | 2qwy (A)              | SAM                                                            | Score: 27 |
| PreQ <sub>1</sub> -I  | RF00522        | 3k1v (A)              | PRF                                                            | Score: 26 |
|                       | preQ1-I-3q50   | 3q50 (A)              | PRF                                                            |           |
| PreQ <sub>1</sub> -II | RF01054        | 2miy (A)              | PRF                                                            | Score: 29 |
|                       | RF01054        | 4jf2 (A)              | PRF                                                            | Score: 29 |
| SAH                   | RF01057        | 3npq (A)              | SAH                                                            | Score: 34 |
| 2'-deoxyG             | RF01510        | 3ski (A)              | GNG                                                            |           |
| SAM-I/IV variant      | RF01725        | 4oqu (A)              | SAM                                                            |           |
| SAM-III               | RF01767        | 3e5c (A)              | SAM                                                            | Score: 42 |
| THF                   | RF01831        | 3sux (X)              | THF                                                            |           |
|                       | RF01831        | 4lvv (A)              | FFO                                                            |           |
| Fluoride              | RF01734        | 4enb (A)              | F                                                              |           |

|                                     |           |          |     |        |
|-------------------------------------|-----------|----------|-----|--------|
| C-di-AMP                            | RF00379   | 4qlm (A) | 2BA |        |
|                                     | RF00379   | 4w90 (C) | 2BA |        |
| Mg <sup>2+</sup> -I ( <i>ykoK</i> ) | RF00380   | 2qbz (X) | MG  |        |
| Ni/Co                               | NiCo      | 4rum (A) | CO  |        |
| AdoCbl (B <sub>12</sub> )           | RF00174   | 4gma (Z) | B1Z |        |
|                                     | RF00174   | 4gxy (A) | B1Z |        |
|                                     | RF01482   | 4gxy (A) | B1Z |        |
| AqCbl (B <sub>12</sub> )            | RF01689   | 4frn (A) | I2A |        |
| C-di-GMP-II                         | RF01786   | 3q3z (V) | C2E |        |
| Guanine                             | RF00167   | 4fe5 (B) | HPA |        |
| Adenine                             | RF00167   | 1y26 (X) | ADE |        |
| C-di-GMP-I /<br>C-AMP-GMP           | RF01051   | 3irw (R) | C2E | No GSC |
|                                     | RF01051   | 4yaz (A) | 4BW | No GSC |
| preQ <sub>1</sub> -III              | preQ1-III | 4rzd (A) | PRF |        |
| ZTP                                 | RF01750   | 4znp (A) | AMZ |        |
|                                     | RF01750   | 5btp (A) | AMZ |        |
|                                     | RF01750   | 4xwf (A) | AMZ |        |
| Mn <sup>2+</sup>                    | RF00080   | 4y1i (A) | MN  |        |
|                                     | yybP-4Y1I | 4y1i (A) | MN  |        |
| Glutamine                           | RF01739   | 5ddp (A) | GLN |        |

**Table S2.** Genes associated with various groups of c-di-GMP-I riboswitches that might have altered ligand specificity. At a distance of 2.75 Å, three key nucleotides are found in c-di-GMP-I riboswitches: G20, A47 and C92. Genes regulated by riboswitches in each candidate group are given with their frequencies (out of 1). For comparison, frequencies are also given for riboswitches in the G,A,C group, which correspond to c-di-GMP-I riboswitches whose key nucleotides are identical to those in the crystallized RNA, as well as the A,A,C group, which corresponds to c-AMP-GMP riboswitches. Blank entries mean the frequency is zero.

| Group (key nucleotides) | Frequency in candidate group | Frequency in G,A,C group | Frequency in A,A,C group | Gene encodes                                             |
|-------------------------|------------------------------|--------------------------|--------------------------|----------------------------------------------------------|
| G,G,C                   | 0.51                         | 0.024                    | 0.015                    | SCP-like extracellular domain                            |
| G,G,C                   | 0.34                         | 0.0025                   | 0.001                    | PulF (Type-II secretory pathway)                         |
| G,G,C                   | 0.17                         | 0.002                    |                          | Uncharacterized protein, YkwD (might be SCP-like)        |
| U,A,C                   | 0.44                         | 0.0025                   | 0.0031                   | Na <sup>+</sup> /H <sup>+</sup> antiporter               |
| U,A,C                   | 0.11                         | 0.00047                  | 0.00069                  | Collagen-binding protein B                               |
| U,A,C                   | 0.11                         |                          |                          | Urease, gamma subunit                                    |
| U,A,C                   | 0.055                        | 0.0035                   | 0.0016                   | ATPase                                                   |
| U,A,C                   | 0.055                        |                          |                          | Stage V sporulation protein K                            |
| U,A,C                   | 0.037                        | 0.0006                   | 0.0005                   | c-di-GMP synthase                                        |
| U,A,C                   | 0.037                        | 0.0012                   | 0.001                    | Methyl-accepting chemotaxis domain                       |
| U,A,C                   | 0.037                        | 0.0077                   | 0.0035                   | Histidine kinase                                         |
| U,A,C                   | 0.037                        | 0.0048                   | 0.00086                  | Cache domain                                             |
| U,A,C                   | 0.037                        | 0.0098                   |                          | EAL domain (c-di-GMP phosphodiesterase)                  |
| U,A,C                   | 0.037                        | 0.00016                  |                          | Putative c-di-GMP phosphodiesterase                      |
| U,A,U                   | 0.5                          |                          |                          | DUF3179, unknown function                                |
| U,A,U                   | 0.5                          | 0.0028                   |                          | Spherulation-specific family 4 (involved in sporulation) |

**Table S3.** Genes of groups of c-di-GMP-II riboswitches that are candidates for changes in ligand specificity. Genes regulated by each candidate group of riboswitches are given with their frequencies (out of 1). For comparison, riboswitches in the better-characterized G,A,A group is given, as this group contains the crystallized c-di-GMP-II riboswitch. Because class II riboswitches are rarer than class I riboswitches, frequencies for class I riboswitches probably reflect gene associations better. Therefore, the cyclic-di-GMP-I class G,A,C group (presumably binding c-di-GMP) and A,A,C group (presumably binding c-AMP-GMP) are also represented in the table. Blank entries mean the frequency is zero. Many genes are associated with the G,A,G-group, so only the most common are listed. The complete list of genes is in **Dataset S1** at <http://breaker.yale.edu/variants>.

| Group (key nucleotide)                         | Frequency in G,A,G | Frequency in G,A,A group | Frequency in G,A,C group of c-di-GMP-I riboswitches | Frequency in A,A,C group of c-di-GMP-I riboswitches | Gene encodes                                                           |
|------------------------------------------------|--------------------|--------------------------|-----------------------------------------------------|-----------------------------------------------------|------------------------------------------------------------------------|
| G,A,G                                          | 0.11               | 0.011                    | 0.01                                                | 0.012                                               | S8/S53 peptidase (S8 is regulated by c-di-AMP riboswitches)            |
| G,A,G                                          | 0.099              |                          | 0.00035                                             |                                                     | COG4179 (unknown function)                                             |
| G,A,G                                          | 0.06               |                          | 0.007                                               |                                                     | Discoidin domain                                                       |
| G,A,G                                          | 0.056              |                          | 0.00047                                             |                                                     | Tol transport system, periplasmic component                            |
| G,A,G                                          | 0.049              |                          | 0.00035                                             |                                                     | N-acetylglucosaminephosphatidylinositol de-N-acetylase (GPI synthesis) |
| G,A,G                                          | 0.048              | 0.044                    | 0.00096                                             |                                                     | Cellulose synthase                                                     |
| G,A,G                                          | 0.043              | 0.039                    | 0.0025                                              | 0.016                                               | COG4932, outer-membrane protein                                        |
| G,A,G                                          | 0.041              | 0.0015                   | 0.0022                                              | 0.036                                               | Bacterial Ig-like                                                      |
| G,A,G                                          | 0.04               | 0.0096                   | 0.00071                                             | 0.0062                                              | Cna protein, B-type                                                    |
| G,A,G                                          | 0.034              |                          | 0.001                                               |                                                     | Pentapeptide repeats                                                   |
| <i>Rarer genes not listed for G,A,G group.</i> |                    |                          |                                                     |                                                     |                                                                        |
| A,A,U                                          | 0.25               |                          |                                                     |                                                     | Glucose/galactose-binding protein (involved in chemotaxis)             |
| A,A,U                                          | 0.23               |                          |                                                     |                                                     | Flagellar motor switch                                                 |
| A,A,U                                          | 0.24               | 0.079                    | 0.02                                                | 0.027                                               | Methyl-accepting chemotaxis                                            |
| A,A,U                                          | 0.12               | 0.0038                   | 0.0025                                              |                                                     | Alpha-tubulin suppressor                                               |
| A,A,U                                          | 0.074              | 0.025                    | 0.019                                               | 0.0092                                              | HAMP domain (signaling)                                                |
| A,A,U                                          | 0.056              | 0.00099                  | 0.0048                                              | 0.0021                                              | Cache domain                                                           |
| A,A,U                                          | 0.051              |                          |                                                     |                                                     | Large tegument protein UL36                                            |
| G,C,G                                          | 0.25               |                          | 0.0039                                              |                                                     | GYD domain (unknown function)                                          |
| G,C,G                                          | 0.19               |                          |                                                     |                                                     | DNA methylase                                                          |
| G,C,G                                          | 0.16               |                          | 0.0011                                              |                                                     | Acetyltransferase/hydrolase                                            |
| G,C,G                                          | 0.12               |                          | 0.00047                                             |                                                     | DUF3607 (unknown function)                                             |
| G,C,G                                          | 0.074              |                          | 0.0012                                              | 0.001                                               | S53 peptidase                                                          |
| G,C,G                                          | 0.061              | 0.0065                   |                                                     |                                                     | SPRBCC ligand-binding domain                                           |

|       |       |        |         |        |                                      |
|-------|-------|--------|---------|--------|--------------------------------------|
| A,A,A | 0.36  |        | 0.00018 |        | YhcR endonuclease                    |
| A,A,A | 0.36  |        |         |        | NOP14-like (ribosome maturation)     |
| A,A,A | 0.31  | 0.0077 | 0.0083  | 0.01   | PAS domain                           |
| A,C,U | 0.31  |        | 0.003   | 0.033  | Ig-like                              |
| A,C,U | 0.22  | 0.038  | 0.021   |        | Signal receiver domain               |
| A,C,U | 0.2   | 0.0048 | 0.0047  | 0.0039 | Histidine-kinase-like ATPases        |
| A,C,U | 0.2   | 0.0036 | 0.0004  |        | Signal transduction histidine kinase |
| A,C,U | 0.074 | 0.0022 | 0.0038  |        | Response regulator receiver domain   |



**Table S4.** List of oligonucleotides used in this study.

| Name of Oligonucleotide | Sequence                                                                                                                                                                                                                                     | Purpose                                                                                                                                                |
|-------------------------|----------------------------------------------------------------------------------------------------------------------------------------------------------------------------------------------------------------------------------------------|--------------------------------------------------------------------------------------------------------------------------------------------------------|
| UCC5                    | TAATACGACTCACTATAGG<br>GTAACCTTGTAATTCGGG<br>GGATTGGCCCCGGAGTAT<br>CCACGACCGG                                                                                                                                                                | Forward primer for the construction of a template for transcription of the 71 <i>env-23</i> RNA.                                                       |
| UCC6                    | TTCCCTGGATGCACCGG<br>ATTATGGTCCGGTCGTGG<br>ATACTCCGG                                                                                                                                                                                         | Reverse primer for the construction of a template for transcription of the 71 <i>env-23</i> RNA.                                                       |
| UCC7                    | TAATACGACTCACTATAGG<br>GGGACCTTGAGTCCCA<br>GGATTGGCTGGGGAGCAT<br>CCACCTCCGG                                                                                                                                                                  | Forward primer for the construction of a template for transcription of the 71 <i>env-16</i> RNA from <i>G. tropica</i> DSM 19535.                      |
| UCC8                    | CTCCCCTGGCGGCTCCGG<br>ATTAAGGTCCGGAGGTGG<br>ATGCTCCCCAGC                                                                                                                                                                                     | Reverse primer for the construction of a template for transcription of the 71 <i>env-16</i> RNA from <i>G. tropica</i> DSM 19535.                      |
| UGC1                    | TAATACGACTCACTATAGG<br>GTTCTTGATAAGCTCAAT<br>AATATGGTTTGAGCGTCTC<br>GACCAGGC                                                                                                                                                                 | Forward primer for the construction of a template for transcription of the 72 <i>coxL</i> RNA from <i>D. meridiei</i> .                                |
| UGC2                    | TTCATGTAGCCTGGGCAA<br>TTTATGGTTGCCTGGTCGA<br>GACGCTC                                                                                                                                                                                         | Reverse primer for the construction of a template for transcription of the 72 <i>coxL</i> RNA from <i>D. meridiei</i> .                                |
| CEL0371                 | TCGTAATACGACTCACTAT<br>AGGTCGGATGAGGGACG<br>TCCTAGACACCGCAAGGG<br>GCCGAAGAAGCAAAACGT<br>AAGGTAACATCTTCCTTTC<br>GTGGAAACTGACAGGCAA<br>AAAGGAAGGCGACCTGAC<br>GAATCTTTGGAGAGTGTG<br>CAAAGAAAGCACCACTA<br>CGAGGCTAGAACCAACTG<br>GTAAAAGGACAGAGAA | gBlock containing the 175 <i>sdh</i> RNA from <i>C. comes</i> ATCC 27758 shown in Fig. S4. Designed for use as a PCR template using the primers below. |

|         |                                                                                                                                                                                                                                                                               |                                                                                                                                                             |
|---------|-------------------------------------------------------------------------------------------------------------------------------------------------------------------------------------------------------------------------------------------------------------------------------|-------------------------------------------------------------------------------------------------------------------------------------------------------------|
|         |                                                                                                                                                                                                                                                                               |                                                                                                                                                             |
| CEL0372 | TCGTAATACGACTCACTAT<br>AGGTCGGATGAGGG                                                                                                                                                                                                                                         | Forward primer for the construction of a template for transcription of the 175 <i>sdh</i> RNA from <i>C. comes</i> ATCC 27758 shown in Fig. S4.             |
| CEL0373 | TTCTCTGTCCTTTTACCAGT<br>TGGTTCTAGCCTCG                                                                                                                                                                                                                                        | Reverse primer for the construction of a template for transcription of the full length 175 <i>sdh</i> RNA from <i>C. comes</i> ATCC 27758 shown in Fig. S4. |
| CEL0405 | TCGTCAGGTCGCCTTCCTT<br>TTTGCC                                                                                                                                                                                                                                                 | Reverse primer for the construction of a template for transcription of the aptamer I 107 <i>sdh</i> RNA from <i>C. comes</i> ATCC 27758.                    |
| CEL0422 | TCGTAATACGACTCACTAT<br><u>AGGAAGGCGACCTGACGA</u><br><u>ATCTTTGGAGAGTGTGCA</u><br>AAGAAAGC                                                                                                                                                                                     | Forward primer for the construction of a template for transcription of the 85 <i>sdh</i> RNA from <i>C. comes</i> ATCC 27758.                               |
| CEL0423 | TTCTCTGTCCTTTTACCAGT<br>TGGTTCTAGCCTCGTAGGT<br>GGTGCTTTCTTTGCACACT<br>C                                                                                                                                                                                                       | Reverse primer for the construction of a template for transcription of the 85 <i>sdh</i> RNA from <i>C. comes</i> ATCC 27758.                               |
| CEL0414 | TCGTAATACGACTCACTAT<br>AGGAAAATGTAAACCGTA<br>TGATAACAGTCTGAAACA<br>TTCTTTATATAAAGAAGAC<br>CGAAGCGGAAAGCTAAAG<br>TACTAACATCACTTTAGTG<br>AAACTGACAGGTAAAGCA<br>AATGACTGTTTGACGGAA<br>CCTTGAAAGACTATCTTA<br>GAGATAGAGCCAATGAGG<br>CAATAACCAACTGGCAA<br>AAGACAGGGAAAGTTTAT<br>TAT | gBlock containing the 201 <i>potE</i> RNA from <i>Clostridium</i> sp. ASF356. Designed for use as a PCR template using the primers below.                   |

|         |                                                                                                 |                                                                                                                                                                                                                  |
|---------|-------------------------------------------------------------------------------------------------|------------------------------------------------------------------------------------------------------------------------------------------------------------------------------------------------------------------|
| CEL0415 | TCGTAATACGACTCACTAT<br>AGGAAAATGTAAACCGTA<br>TGATAACAG                                          | Forward primer for the construction of a template for transcription of the full length 201 <i>potE</i> RNA from <i>Clostridium sp.</i> ASF356.                                                                   |
| CEL0416 | ATAATAAACTTTCCCTGTC<br>TTTTTGCCAGTTGGTTATT<br>GCC                                               | Reverse primer for the construction of a template for transcription of the full length 201 <i>potE</i> RNA from <i>Clostridium sp.</i> ASF356.                                                                   |
| CEL0417 | TCGTAATACGACTCACTAT<br>AGGCCGTATGATAACAGT<br>CTGAAACATTCTTTATATA<br>AAGAAGACCG                  | Forward primer for the construction of a template for transcription of the concise full 181 <i>potE</i> RNA from <i>Clostridium sp.</i> ASF356.                                                                  |
| CEL0409 | TTCCCTGTCTTTTGCCAG<br>TTGGTTATTGCCTCATTGG<br>CTCTATC                                            | Reverse primer for the construction of a template for transcription of the concise full length 181 <i>potE</i> RNA from <i>Clostridium sp.</i> ASF356 and 67 <i>potE</i> RNA from <i>Clostridium sp.</i> ASF356. |
| CEL0406 | TCGTAATACGACTCACTAT<br>AGGCCGTATGATAACAGT<br>CTGAAACATTCTTTATATA<br>AAGAAGACCGAAGCGGA<br>AAGC   | Forward oligo for the construction of a template through primer extension for transcription of 115 <i>potE</i> RNA from <i>Clostridium sp.</i> ASF356.                                                           |
| CEL0407 | TTCCGTCAAACAGTCATTT<br>GCTTTACCTGTCAGTTTCA<br>CTAAAGTGATGTTAGTACT<br>TTAGCTTTCCGCTTCGGTC<br>TTC | Reverse oligo for the construction of a template through primer extension for transcription of 115 <i>potE</i> RNA from <i>Clostridium sp.</i> ASF356.                                                           |
| CEL0408 | TCGTAATACGACTCACTAT<br>AGGACCTTGAAAGACTA<br>TCTTAGAGATAGAGCCAA<br>TGAGGC                        | Forward oligo for the construction of a template through primer extension for transcription of 67 <i>potE</i> RNA from <i>Clostridium sp.</i> ASF356.                                                            |

|         |                                                                                                                                                                                                                                                                           |                                                                                                                                                        |
|---------|---------------------------------------------------------------------------------------------------------------------------------------------------------------------------------------------------------------------------------------------------------------------------|--------------------------------------------------------------------------------------------------------------------------------------------------------|
|         |                                                                                                                                                                                                                                                                           |                                                                                                                                                        |
| CEL0424 | TCGTAATACGACTCACTAT<br>AGGCAAATGACTGTTTGA<br>CGGAACCTTGAAAGACT<br>ATCTTAGAGATAGAGCC                                                                                                                                                                                       | Forward primer for the construction of a template through primer extension for transcription of 98 <i>potE</i> RNA from <i>Clostridium sp.</i> ASF356. |
| CEL0425 | ATAATAAACTTTCCCTGTC<br>TTTTTGCCAGTTGGTTATT<br>GCCTCATTGGCTCTATCTC<br>TAAGATAGTC                                                                                                                                                                                           | Reverse primer for the construction of a template through primer extension for transcription of 98 <i>potE</i> RNA from <i>Clostridium sp.</i> ASF356. |
| CEL0418 | TCGTAATACGACTCACTAT<br>AGGTCAAATATGTTTCGGA<br>TGAGGACTGCATTAGAGA<br>CTTTTTAAATGAAGCGCCG<br>AAGAAGCAAACAGAAAT<br>TTCATCTGTTTCTGTGGA<br>AACTGACAGGCAAAGGA<br>GGGCAGTCTGACGATACT<br>TTGGAGAGAGTGATTTAA<br>TTCACCGCCTACGAGGAT<br>ATAACCAACTGGCAAAG<br>GACAGAGATATAGATGCA<br>C | gBlock containing the 198 <i>sdh</i> RNA from <i>Clostridium hiranonis</i> DSM 13275. Designed for use as a PCR template using the primers below.      |
| CEL0419 | TCGTAATACGACTCACTAT<br>AGGTCAAATATGTTTCGGA<br>TGAGG                                                                                                                                                                                                                       | Forward primer for the construction of a template for transcription of 198 <i>sdh</i> RNA from <i>C. hiranonis</i> DSM 13275.                          |
| CEL0420 | GTGCATCTATATCTCTGTC<br>CTTTTGCCAGTTGG                                                                                                                                                                                                                                     | Reverse primer for the construction of a template for transcription of 198 <i>sdh</i> RNA from <i>C. hiranonis</i> DSM 13275.                          |
| CEL0421 | TCGTAATACGACTCACTAT<br>AGGTTCGGATGAGGACTGC                                                                                                                                                                                                                                | Forward primer for the construction of a template for transcription of 178 <i>sdh</i> RNA from <i>C. hiranonis</i> DSM                                 |

|         |                                                                                                |                                                                                                                                                       |
|---------|------------------------------------------------------------------------------------------------|-------------------------------------------------------------------------------------------------------------------------------------------------------|
|         | ATTAGAGAC                                                                                      | 13275.                                                                                                                                                |
| CEL0413 | ATCTCTGTCCTTTTGCCAG<br>TTGGTTATATCCTCGTAGG<br>CGGTG                                            | Reverse primer for the construction of a template for transcription of 178 <i>sdh</i> RNA and 66 <i>sdh</i> RNA from <i>C. hiranonis</i> DSM 13275.   |
| CEL0410 | TCGTAATACGACTCACTAT<br>AGGTCGGATGAGGACTGC<br>ATTAGAGACTTTTTAAATG<br>AAGCGCCGAAGAAGCAAA<br>ACAG | Forward oligo for the construction of a template through primer extension for transcription of 113 <i>sdh</i> RNA from <i>C. hiranonis</i> DSM 13275. |
| CEL0411 | TATCGTCAGACTGCCCTCC<br>TTTTGCCTGTCAGTTTCCA<br>CAGAAACAAGATGAAATT<br>TCTGTTTTGCTTCTTCGGC<br>GC  | Reverse oligo for the construction of a template through primer extension for transcription of 113 <i>sdh</i> RNA from <i>C. hiranonis</i> DSM 13275. |
| CEL0412 | TCGTAATACGACTCACTAT<br>AGGACTTTGGAGAGAGTG<br>ATTTAATTCACCGCTACG                                | Forward oligo for the construction of a template through primer extension for transcription of 66 <i>sdh</i> RNA from <i>C. hiranonis</i> DSM 13275.  |
| CEL0426 | TCGTAATACGACTCACTAT<br>AGGAGGGCAGTCTGACGA<br>TACTTTGGAGAGAGTGAT<br>TTAATTCACCG                 | Forward oligo for the construction of a template through primer extension for transcription of 93 <i>sdh</i> RNA from <i>C. hiranonis</i> DSM 13275.  |
| CEL0427 | GTGCATCTATATCTCTGTC<br>CTTTTGCCAGTTGGTTATA<br>TCCTCGTAGGCGGTGAAT<br>TAAATCACTCTCTC             | Reverse oligo for the construction of a template through primer extension for transcription of 93 <i>sdh</i> RNA from <i>C. hiranonis</i> DSM 13275.  |

|       |                                                                                             |                                                                                                                    |
|-------|---------------------------------------------------------------------------------------------|--------------------------------------------------------------------------------------------------------------------|
| NiCo1 | TCGTAATACGACTCACTAT<br>AGGTCAAATAAGATAAAT<br>CTGAACAAGCGGTAAATT<br>TATTTACGCAGCTGGGTTA<br>C | Forward primer for the construction of a template for transcription of the 102 ATPase RNA from <i>F. hominis</i> . |
| NiCo2 | TTAATAACTGTCTCACAGT<br>GCGCTCTGGCTCTGCTGTT<br>ACATTTTTCATGTAACCCA<br>GCTGCGTAAATA           | Reverse primer for the construction of a template for transcription of the 102 ATPase RNA from <i>F. hominis</i> . |

**Fig. S1.** PAGE analysis of in-line probing reactions of 5' <sup>32</sup>P-labeled 71 *env-23* in the presence of increasing concentrations of 2'-dG. Concentrations range from 320 pM to 100 μM in half-log increments, i.e., the ratio between the concentration of each pair of consecutive concentrations is 10<sup>0.5</sup>. Annotations are as described for **Fig. 3C**.

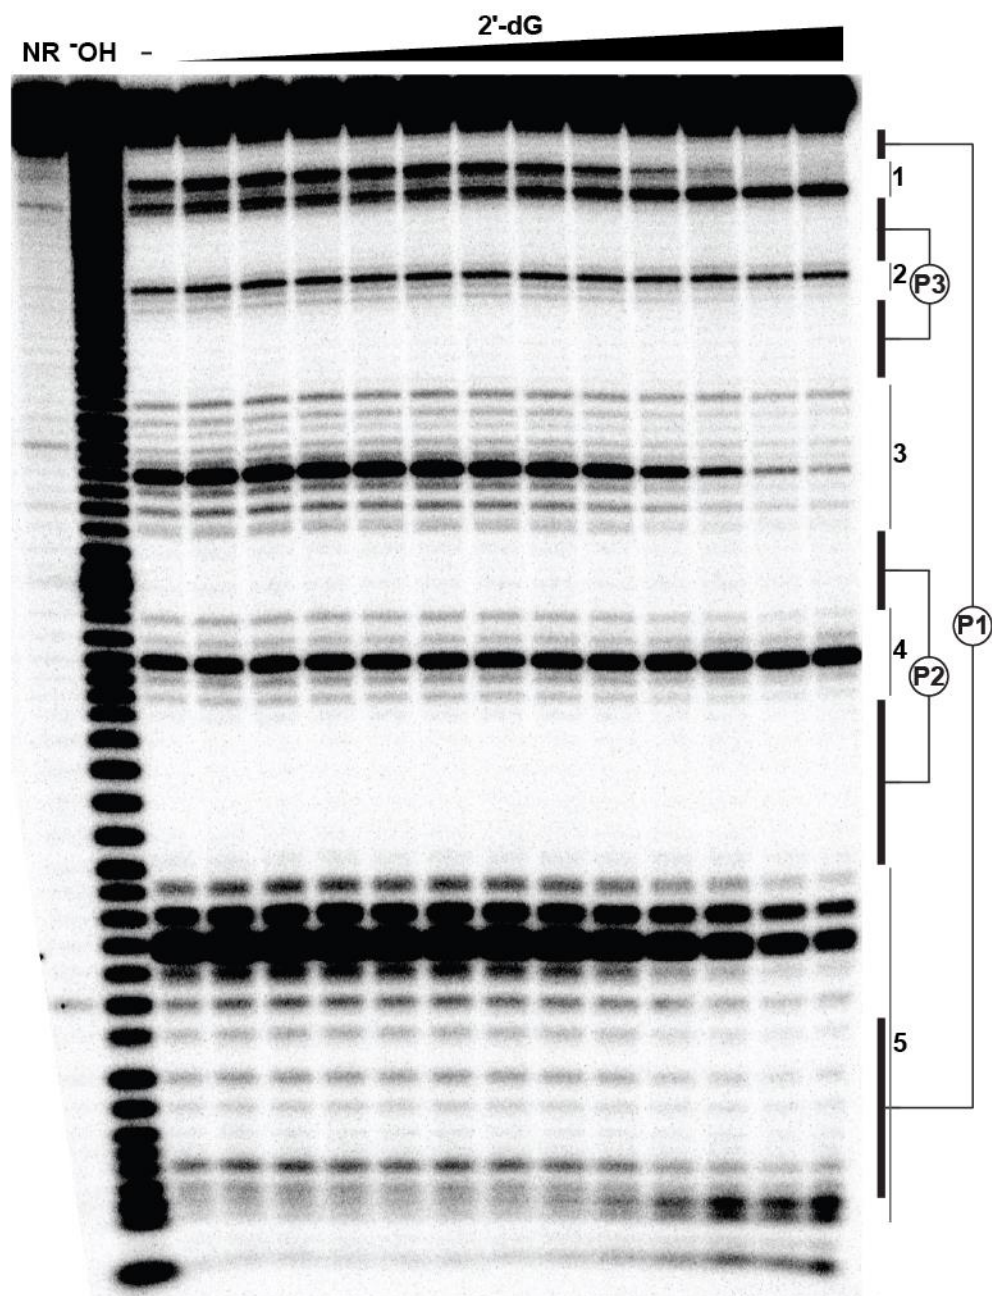

**Fig. S2.** Recognition of 2'-deoxyguanosine by a variant guanine riboswitch aptamer. (A) Sequence and secondary structure of the 71 *env-16* RNA. Labels are as in Fig. 3B. (B) PAGE analysis of in-line probing reactions of 5' <sup>32</sup>P-labeled 71 *env-16* in the presence of increasing 2'-deoxyguanosine (2'-dG; 320 pM to 100 μM in half-log units). Annotations are as described for Fig. 3C. (C) Plot of the fraction of RNA bound to ligand versus the logarithm of the molar concentration (*c*) of 2'-deoxyguanosine. Data are derived from that presented in B. The theoretical binding curve for a one-to-one interaction between ligand and RNA is included.

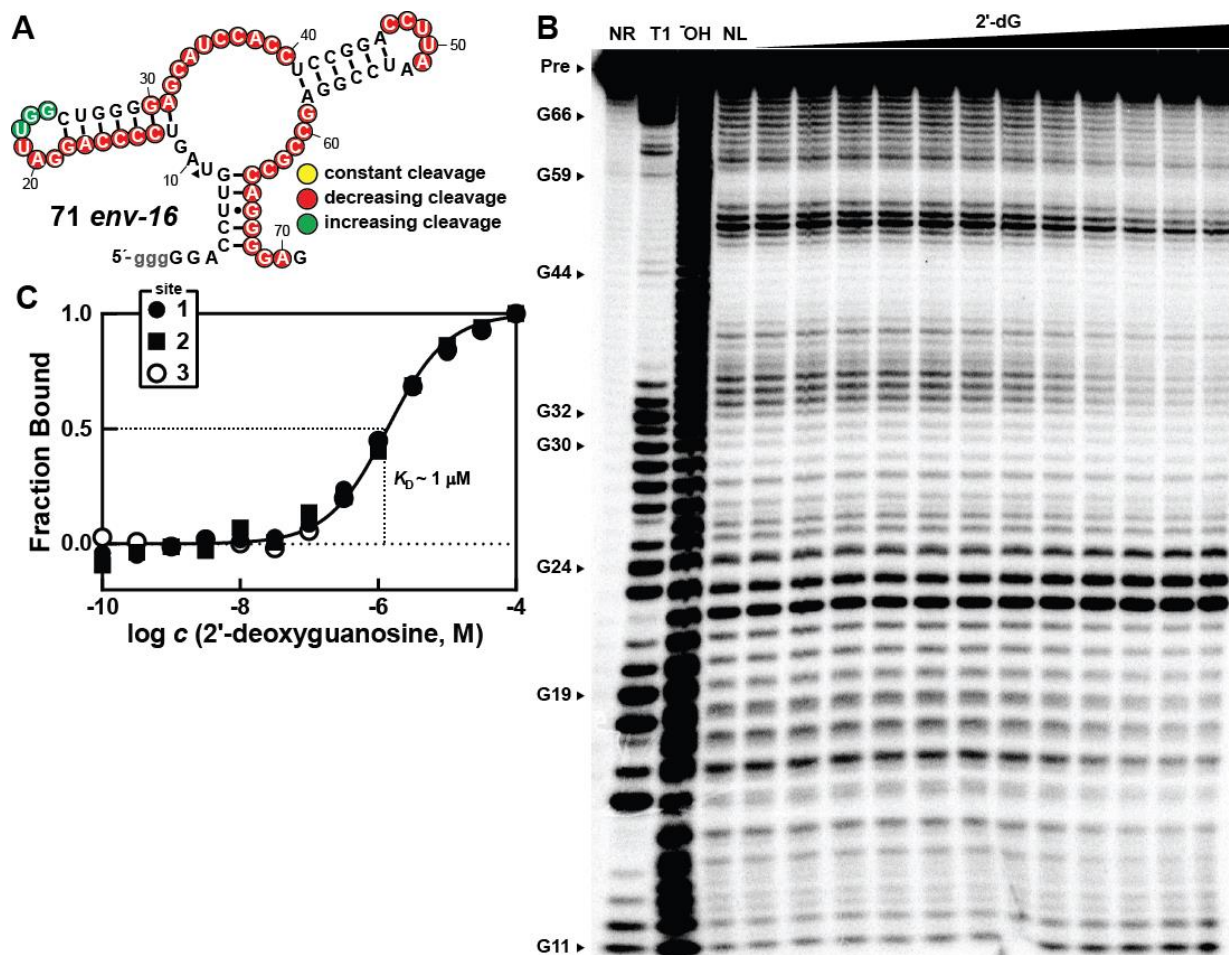



**Fig. S3.** Comparison of the consensus sequences and secondary structure models for (A) guanine, (B) 2'-dG-I, and (C) 2'-dG-II riboswitch aptamers (corresponds to the newly found U,C,C group). Annotations are as described for **Fig. 2A**. Predicted secondary structures depicted in B and C are based on the data presented in A.

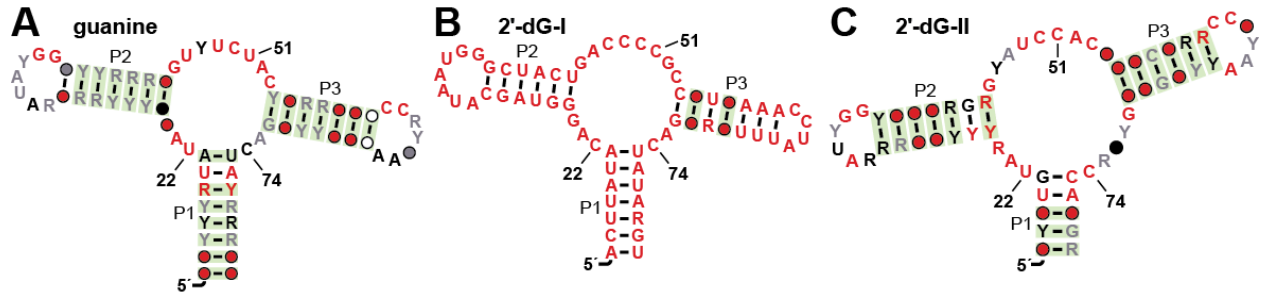

**Fig. S4.** No modulation with tested compounds against a representative U,G,C group variant of guanine riboswitch aptamers. (A) Sequence and secondary structure of the 72 *coxL* from *Desulfosporosinusmeridiei* DSM 13257. Annotations are as described for **Fig. 3B**. (B) PAGE analysis of in-line probing reactions of 5' <sup>32</sup>P-labeled 72 *coxL* in the presence of various ligand candidates. Annotations are as described for **Fig. 3C**.

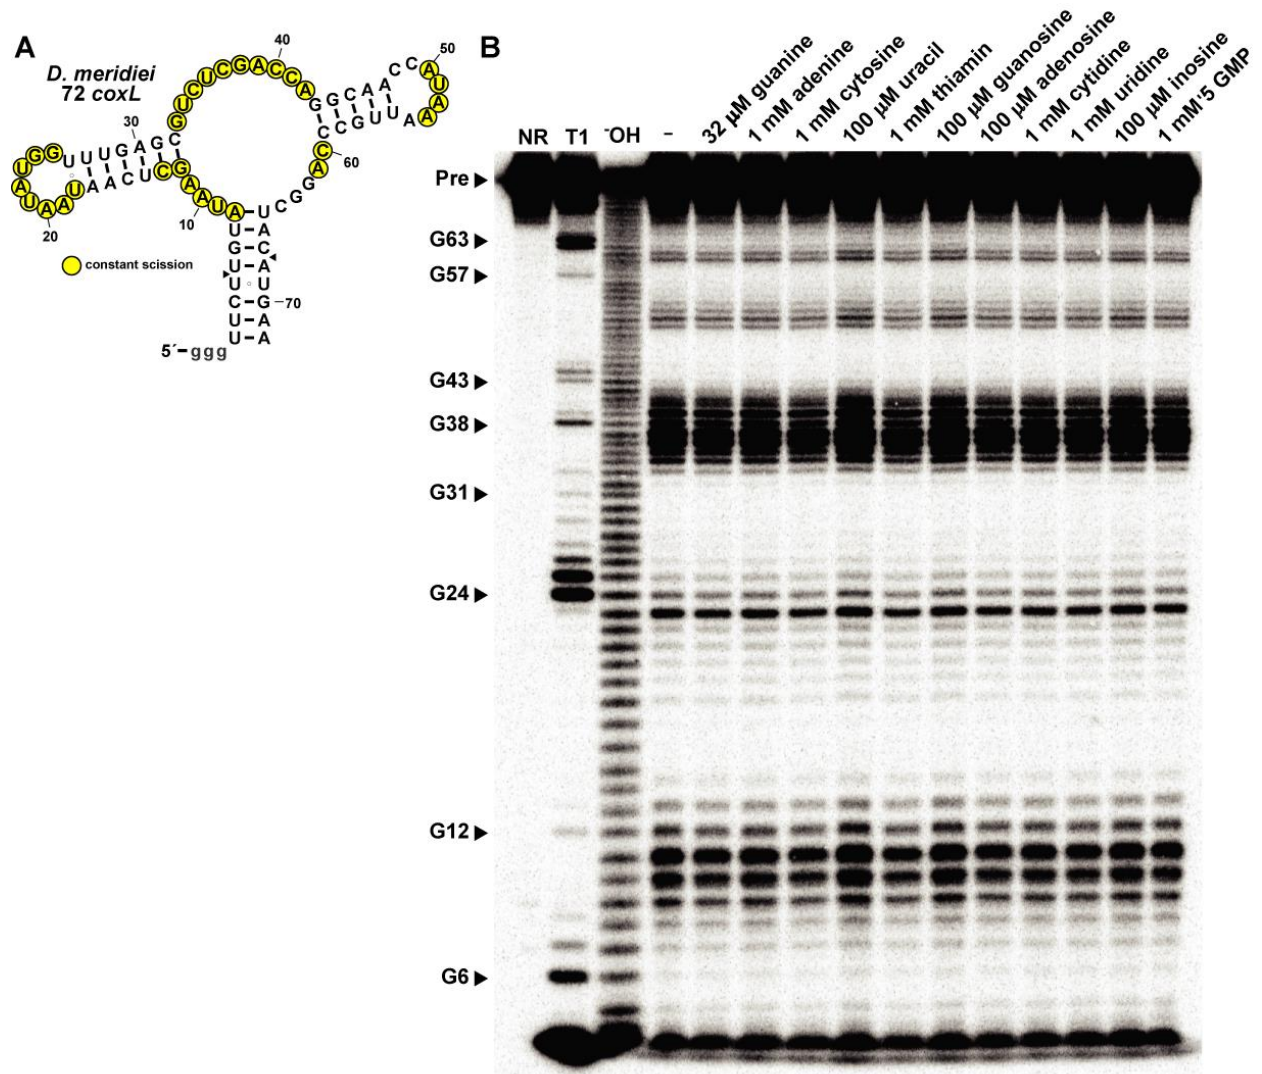

**Fig. S5.** (Next page) Examination of a candidate based on glycine riboswitch variants of the D,G,A group. (A) Sequence and secondary structure model of a D,G,A variant from *Coprococcus comes* ATCC 27758. Yellow circles indicate nucleotides whose 3' linkage exhibits cleavage during in-line probing reactions. These nucleotides are likely to be relatively unstructured, and the data is largely consistent with the proposed secondary structure model. The arrowhead indicates the start of data on the gel. These data are typical of other D,G,A group constructs we tested. (B) PAGE analysis of in-line probing reactions of the molecule from part A in the presence of various compounds. Annotations are as described for **Fig. 3C**. The compounds or mixtures listed were tested, and did not yield evidence of inducing structure modulation. By contrast, the VC I-II construct (1) exhibits structural modulation by glycine, casamino acids, and yeast and beef extract. The following compounds or mixtures were tested on all constructs (see **Table S4**), but did not show indications of binding: tryptophan, glycine, L-alanine, L-asparatate, L-cysteine, L-histidine, L-isooleucine, L-serine, L-threonine, L-lysine, glutamine, L-glutamate, L-valine, L-methionine, L-saccharopine, L-2-aminoadipic acid, 2-oxoadipic acid, 5-hydroxy-L-lysine,  $\alpha$ -ketoglutarate, glycine methyl ester, glycinetert-butylester, glyoxylic acid monohydrate, glycolic acid, glycinamide, glycinehydroxamate, GABA, mercaptoacetic acid, sarcosine, putrescine, cadaverine, spermidine, spermine, c-di-AMP, c-di-GMP, c-AMP-GMP, casamino acids, and yeast and beef extract. (C) Names of D,G,A group variants of glycine riboswitch constructs that were tested. Constructs are sorted based on the organism from which they are derived (columns) and the length of the construct (row). A "tandem" construct is made up of Aptamer I (the 5' aptamer) and Aptamer II (the 3' aptamer). "Extended" tandem molecules add nucleotides on the 5' and 3' ends beyond the known conserved glycine riboswitch structure. "Extended" Aptamer II molecules are extended on their 5' ends to include a 3' part of Aptamer I. The oligonucleotides used to create the various molecules are listed in **Table S4**.

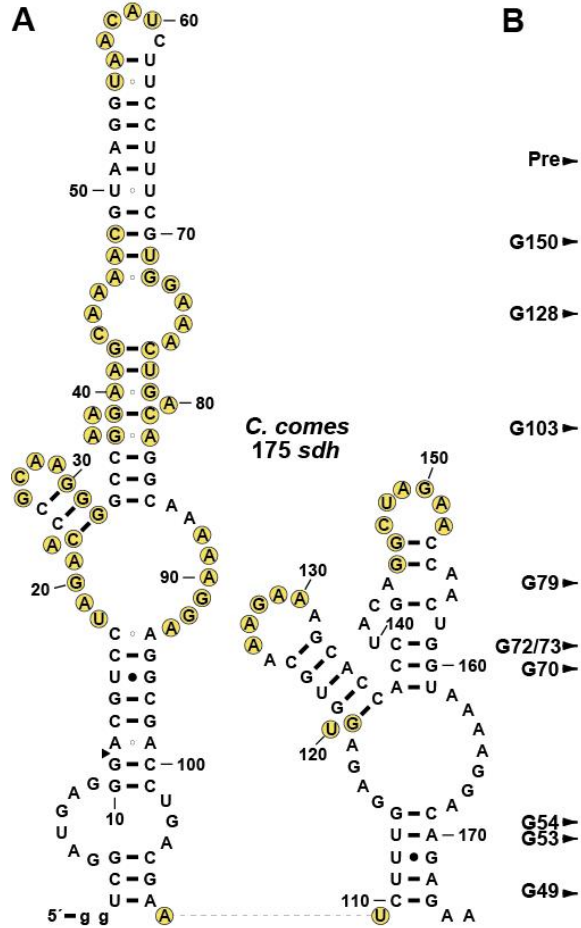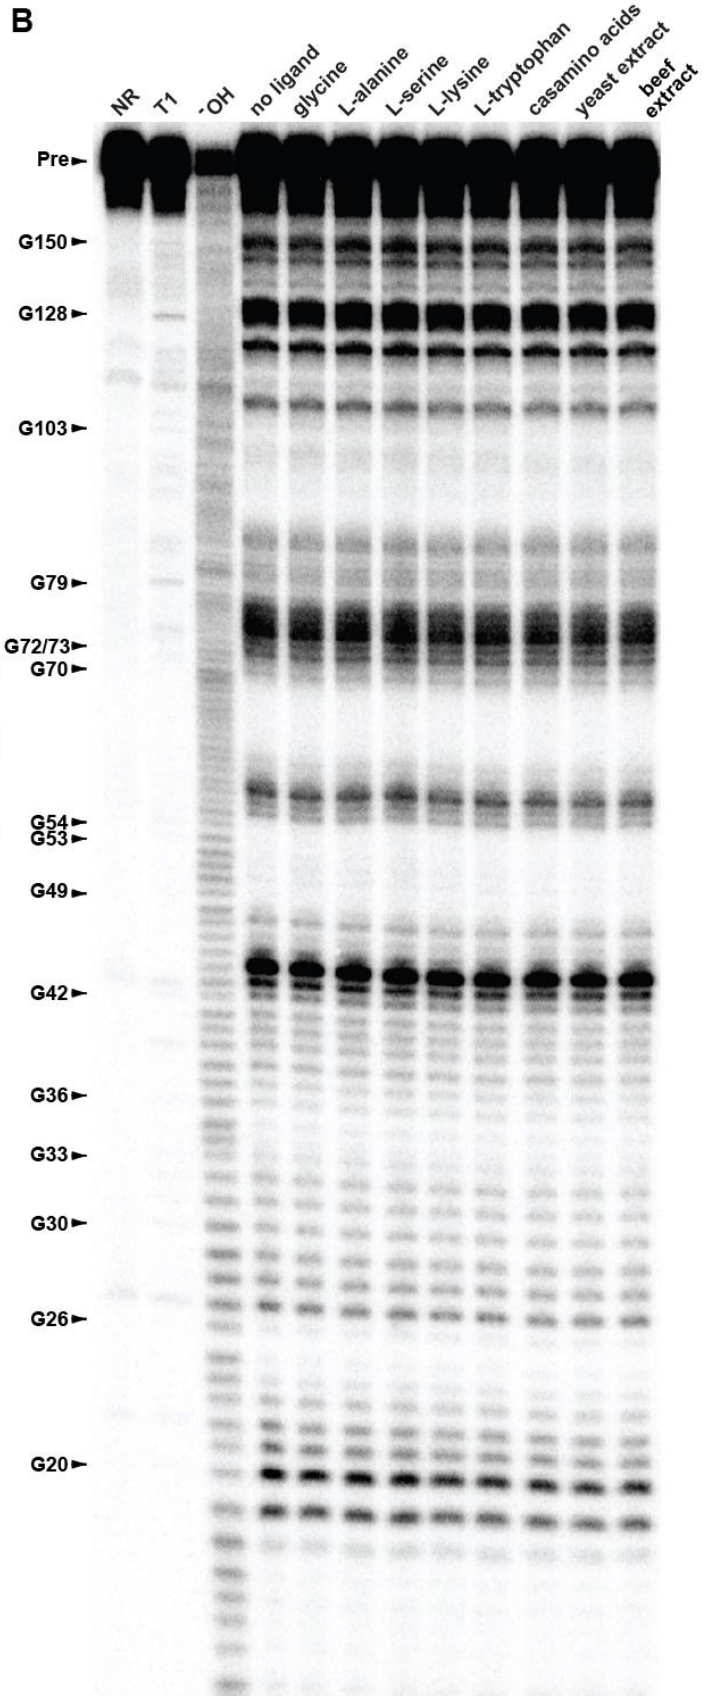

**C**

|                              | source organisms                       |                                  |                                                     |
|------------------------------|----------------------------------------|----------------------------------|-----------------------------------------------------|
|                              | <i>Coprococcus comes</i><br>ATCC 27758 | <i>Clostridium</i><br>sp. ASF356 | <i>Clostridium</i><br><i>hiranonis</i><br>DSM 13275 |
| Full-length tandem, extended | 175 <i>sdh</i>                         | 201 <i>potE</i>                  | 198 <i>sdh</i>                                      |
| Full-length tandem           | Not tested                             | 181 <i>potE</i>                  | 178 <i>sdh</i>                                      |
| Aptamer I                    | 107 <i>sdh</i>                         | 115 <i>potE</i>                  | 113 <i>sdh</i>                                      |
| Aptamer II                   | Not tested                             | 67 <i>potE</i>                   | 66 <i>sdh</i>                                       |
| Aptamer II, extended         | 85 <i>sdh</i>                          | 97 <i>potE</i>                   | 93 <i>sdh</i>                                       |

**Fig. S6.** Candidates based on c-di-GMP-I and c-di-GMP-II riboswitches. (A) Consensus diagram of established c-di-GMP-I riboswitches, with key nucleotides G,A,C labeled. Annotations are as described for **Fig. 2A**. The enclosing P1 stem of c-di-GMP-I riboswitches is not depicted, because it is difficult to align, and not present in Rfam's alignments. The riboswitch sequences in **Dataset S1** are extended on their 5' and 3' ends so as to ensure that the nucleotides that participate in the P1 stem will be present. However, doing so likely includes several nucleotides that do not contribute to forming the binding pocket in **Dataset S1** at <http://breaker.yale.edu/variants>. (B) Consensus of the G,G,C variant group, (C) U,A,C group and (D) U,A,U group.

(Next page) (E) Consensus diagram of established c-di-GMP-II riboswitches, with key nucleotides A,A,G labeled. (F) Consensus of the G,A,G variant group, (G) A,A,U group, (H) G,C,G group, (I) A,A,A group and (J) A,C,U group.

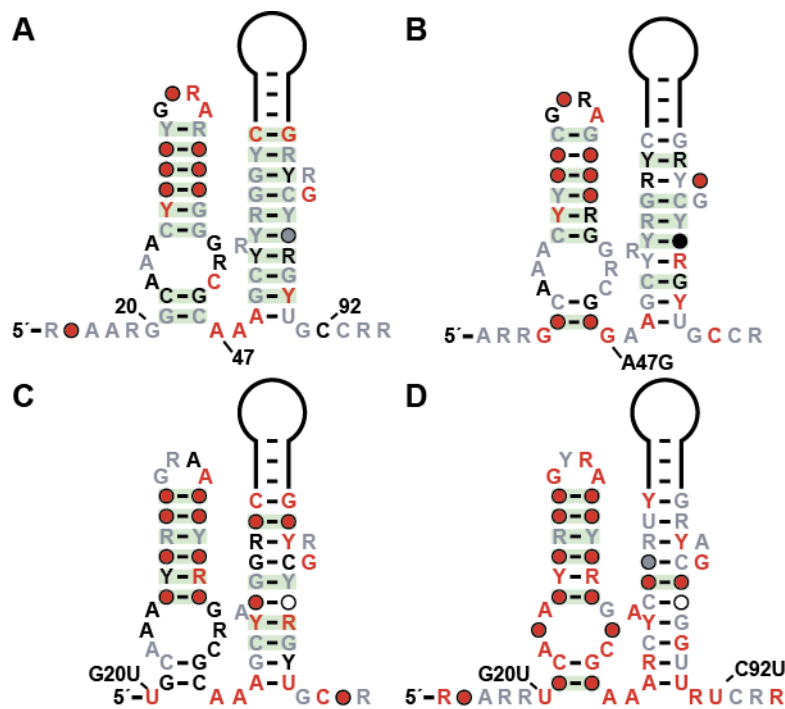

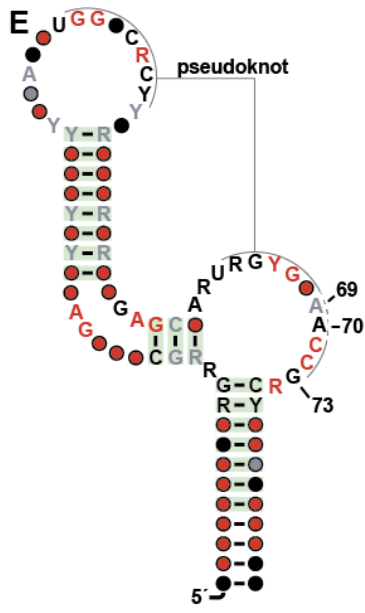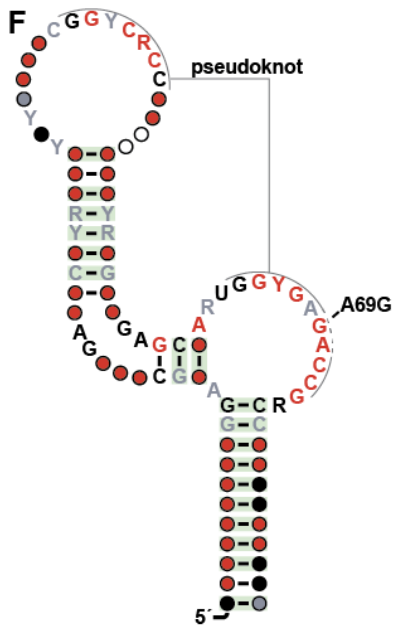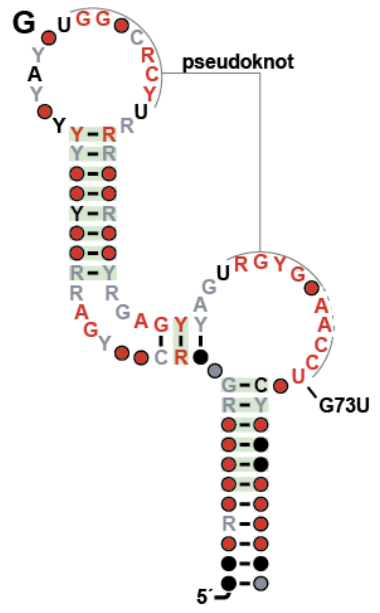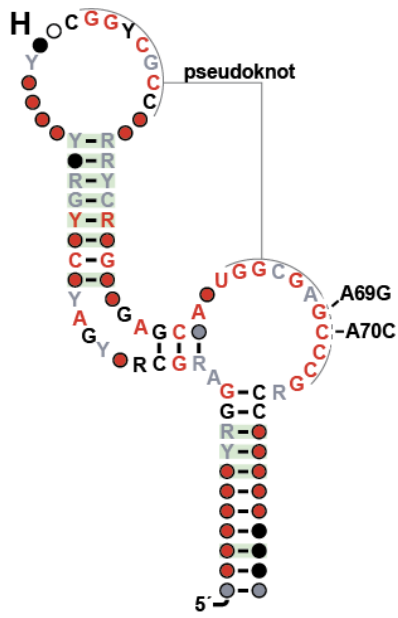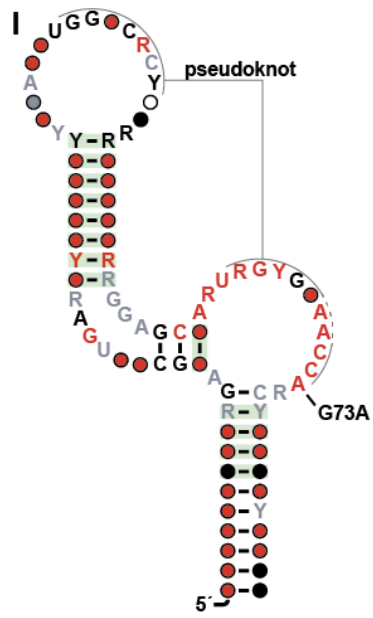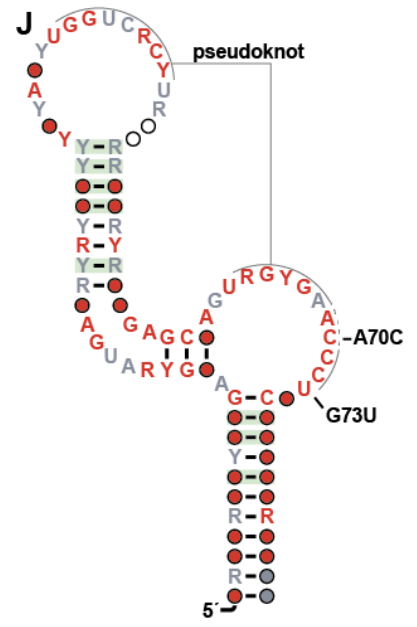

**Fig. S7.** Expanded consensus sequence and secondary structure of variant FMN riboswitches similar to an example published previously (5, 6). Annotations are as described for **Fig. 2A**. Predicted secondary structure is based on bioinformatic and structural data (7-9).

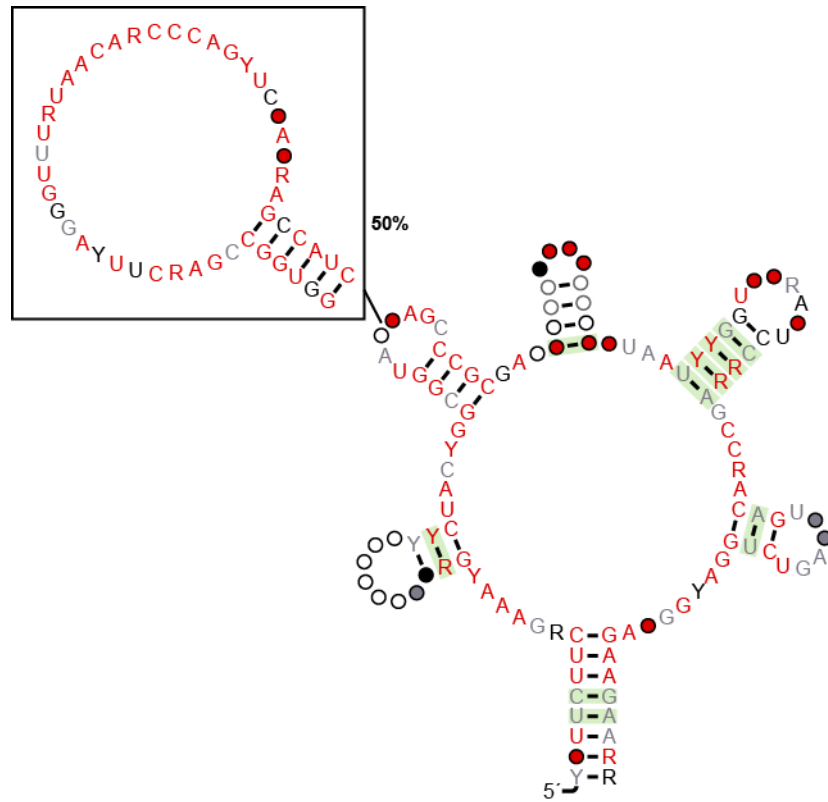

**Fig. S8.** A candidate based on Ni/Co riboswitches. (A) Consensus Ni/Co riboswitch aptamer, with key nucleotides labeled. Nucleotide depictions are as in **Fig. 2A**. S represents either “G” or “C” nucleotides. (B) Consensus of variant riboswitches with G87→A mutation. Changes relative to the crystalized group are labeled in black. Predicted secondary structure is based on data in A. (C) Sequence and secondary structure of the 102 ATPase RNA from *Facklamia homonis*. Labels are as in **Fig. 3B**. (D) PAGE analysis of in-line probing reactions of 5' <sup>32</sup>P-labeled 102 ATPase in the presence of increasing Ni<sup>2+</sup> or Co<sup>2+</sup> (100 nM to 32 μM in half-log units). Labels are as in **Fig. 3C**. (E) Plot of the fraction of RNA bound to ligand versus the log of the molar concentration *c* of added ligand. Data are derived from part D.

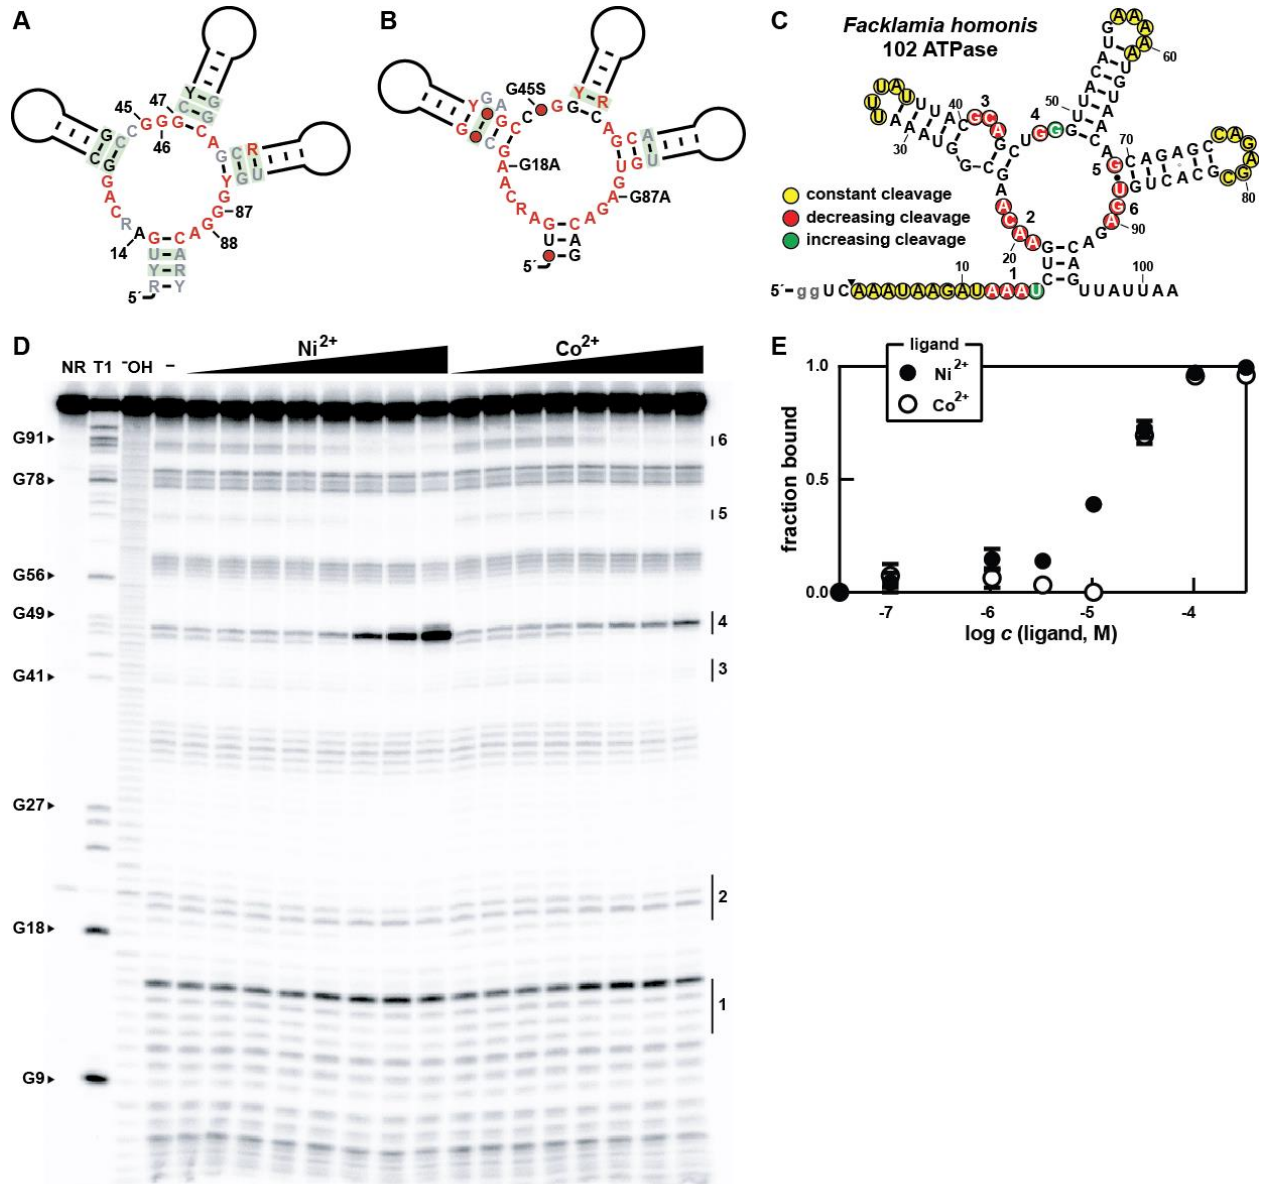



## SI References

1. Mandal M, *et al.* (2004) A glycine-dependent riboswitch that uses cooperative binding to control gene expression. *Science* 306(5694):275-279.
2. Erion TV & Strobel SA (2011) Identification of a tertiary interaction important for cooperative ligand binding by the glycine riboswitch. *RNA* 17(1):74-84.
3. Sherman EM, Esquiaqui J, Elsayed G, & Ye JD (2012) An energetically beneficial leader-linker interaction abolishes ligand-binding cooperativity in glycine riboswitches. *RNA* 18(3):496-507.
4. Furukawa K, *et al.* (2015) Bacterial riboswitches cooperatively bind Ni<sup>2+</sup> or Co<sup>2+</sup> ions and control expression of heavy metal transporters. *Mol Cell* 57(6):1088-1098.
5. Blount KF (2013) *Methods for treating or inhibiting infection by Clostridium difficile*. US Patent Appl No. 13/576,989.
6. Blount KF, *et al.* (2012) *Flavin derivatives*. US Patent Appl No. 13/381,809.
7. Winkler, WC, Cohen-Chalamish, S, Breaker, RR (2002) An mRNA structure that controls gene expression by binding FMN. *Proc. Natl Acad Sci USA* 99(25):15908-15913.
8. Mironov, AA, Gusarov, I, Rafikov, R., Lopez, LE, Shatalin, K, Kreneva, RA, Perumov, DA, Nudler, E (2002) Sensing small molecules by nascent RNA: a mechanism to control transcription in bacteria. *Cell* 111(5):747-756.
9. Serganov, A, Huang L, Patel DJ (2009) Coenzyme recognition and gene regulation by a flavin mononucleotide riboswitch. *Nature* 458(7235):233-237.
